# Supplementary material for: New Autonomous Water-Enabled Self-Healing Coating Material with Antibacterial-Agent-Releasing Properties
Source: MDPI journal article supplement (doi:10.3390/pharmaceutics14051005), 2022-05-07
Supplement: s1 [file s1]

# Supplementary Materials: New Autonomous Water-Enabled Self-Healing Coating Material with Antibacterial-Agent Release Property

Ki-Hak Kim, Hang-Nga Mai, Dong-Choon Hyun and Du-Hyeong Lee

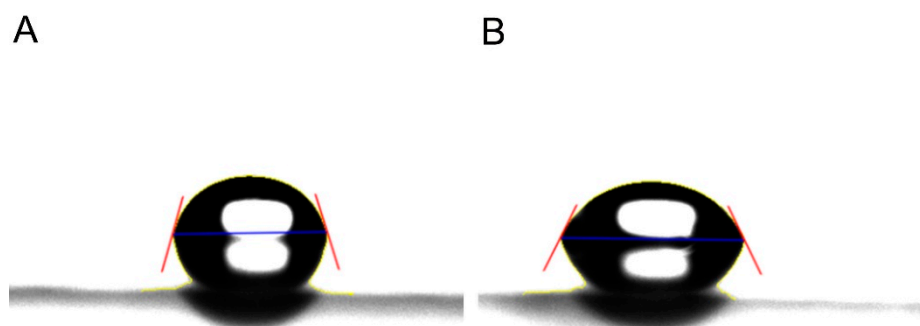

**Figure S1.** Water droplets on: (A) the pristine PMMA substrate and (B) the PMMA substrate incubated with the TA-PEG emulsion (5 mg/mL TA, 1 mg/mL PEG with  $M_w = 100$  kDa, 1 M NaCl) for 120 min.

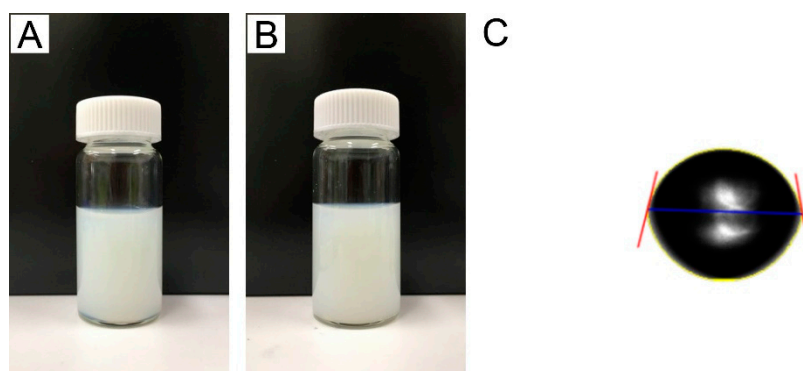

**Figure S2.** (A,B) Photographs of the TA-PEG emulsion without the inclusion of NaCl, which were taken: (A) immediately and (B) at 2 days after mixing TA (10 mg/mL) and PEG (2 mg/mL,  $M_w = 100$  kDa) aqueous solutions. (C) Water droplet on the PMMA substrate incubated with the emulsion in (A) for 120 min.

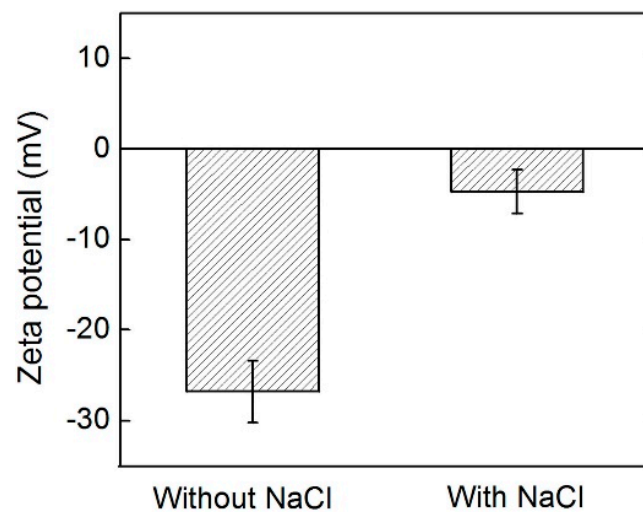

**Figure S3.** Zeta potential of the emulsions with and without NaCl (1 M).

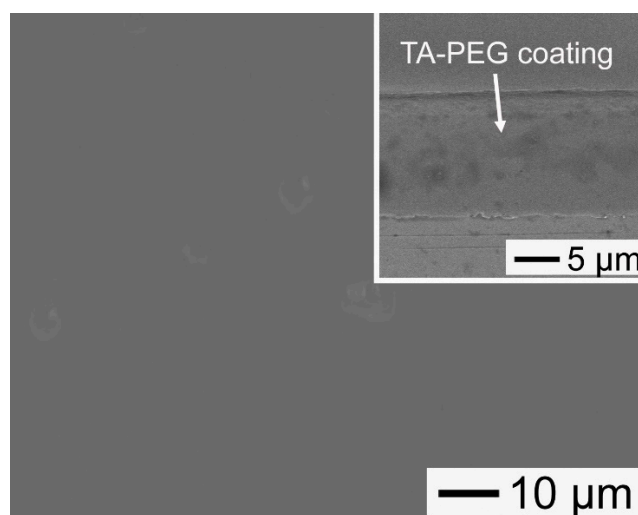

**Figure S4.** SEM images of the surface morphologies of the PMMA substrates incubated with the TA-PEG emulsion (TA: 5 mg/mL, PEG of  $M_w$  =100 kDa: 2.5 mg/mL, NaCl: 1 M) for 120 min. The inset shows a cross-sectional SEM image of the substrate.

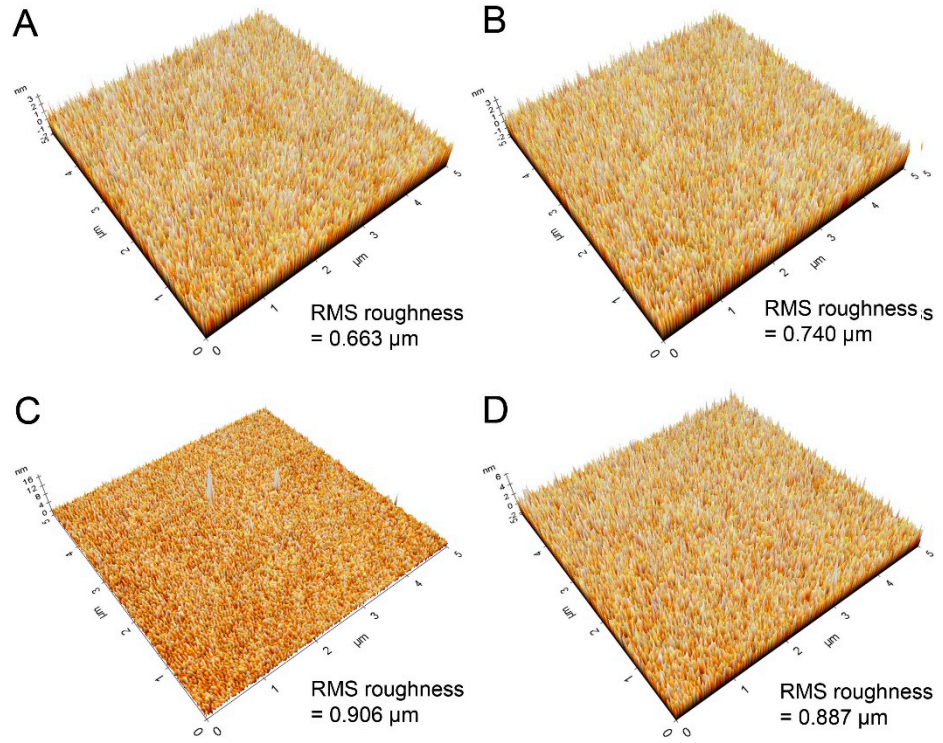

**Figure S5.** AFM images showing the surface roughness of the PMMA substrate, which were prepared through incubation for 10 min, with the TA-PEG emulsions (PEG of  $M_w = 100$  kDa: 5 mg/mL, NaCl: 2 M) containing different concentrations of TA: (A) 2.5 mg/mL, (B) 5.0 mg/mL, (C) 7.5 mg/mL, and (D) 10 mg/mL.

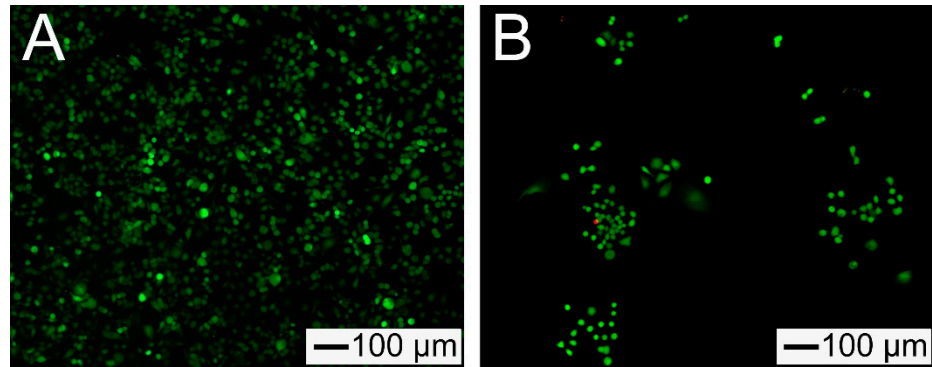

**Figure S6.** CLS micrographs showing live (green) and dead (red) MC3T3-E1 mouse osteoblast cells on the surface of (A) PMMA bare substrate and (B) TA-PEG-coated substrate.
